# Supplementary material for: In Vivo Effects of Joint Movement on Nerve Mechanical Properties Assessed with Shear-Wave Elastography: A Systematic Review and Meta-Analysis
Source: MDPI journal article supplement (doi:10.3390/diagnostics14030343), 2024-02-05
Supplement: s1 [file s1]

## S2 – Search strategy

Search date: 10/07/2023

### ○ Pubmed

("Shearwav\*" OR "Shear Wav\*" OR "Shear-Wav\*" OR "Shear wav\*" OR "Sonoelastograph\*" OR "Acoustic radiation force impulse" OR "ARFI" OR "elastograph\*" OR "shear imaging" OR "Elasticity Imaging Techniques"[Mesh]) AND ("Nerv\*" OR "neural tissue" OR "nervous system" OR "Neurodynami\*" OR "Peripheral Nervous System"[Mesh]) AND ("position\*" OR "postur\*" OR "movement" OR "Angle" OR "Motion" OR "Tension" OR "stretch\*" OR "excursion" OR "biomechanic\*" OR "Posture"[Mesh] OR "Movement"[Mesh] OR "Motion"[Mesh])

### ○ EMBASE

('shearwav\*':ti,ab,kw OR 'shear wav\*':ti,ab,kw OR 'shear-wave\*':ti,ab,kw OR 'sonoelastograph\*':ti,ab,kw OR 'acoustic radiation force impulse':ti,ab,kw OR 'arfi':ti,ab,kw OR 'elastograph\*':ti,ab,kw OR 'shear imaging':ti,ab,kw OR 'elastograph'/exp) AND ('nerv\*':ti,ab,kw OR 'neural tissue':ti,ab,kw OR 'nervous system':ti,ab,kw OR 'neurodynami\*':ti,ab,kw OR 'nerve'/exp OR 'peripheral nervous system'/exp) AND ('position\*':ti,ab,kw OR 'postur\*':ti,ab,kw OR 'movement':ti,ab,kw OR 'angle':ti,ab,kw OR 'motion':ti,ab,kw OR 'tension':ti,ab,kw OR 'stretch\*':ti,ab,kw OR 'excursion':ti,ab,kw OR 'biomechanic\*':ti,ab,kw OR 'movement (physiology)'/exp OR 'body position'/exp)

### ○ Scopus

TITLE-ABS-KEY (("Shearwav\*" OR "Shear Wav\*" OR "Shear-Wav\*" OR "Sonoelastograph\*" OR "Acoustic radiation force impulse" OR "ARFI" OR "elastograph\*" OR "shear imaging") AND ("Nerv\*" OR "neural tissue" OR "nervous system" OR "Neurodynami\*") AND ("position\*" OR "postur\*" OR "movement" OR "Angle" OR "Motion" OR "Tension" OR "stretch\*" OR "excursion" OR "biomechanic\*"))

### ○ Web of Science

TS=((("Shearwav\*" OR "Shear Wav\*" OR "Shear-Wav\*" OR "Sonoelastograph\*" OR "Acoustic radiation force impulse" OR "ARFI" OR "elastograph\*" OR "shear imaging") AND ("Nerv\*" OR "neural tissue" OR "nervous system" OR "Neurodynami\*") AND ("position\*" OR "postur\*" OR "movement" OR "Angle" OR "Motion" OR "Tension" OR "stretch\*" OR "excursion" OR "biomechanic\*"))

- **Science direct**

("shear wave" OR "elastography") AND ("nerve" OR "neural tissue") AND ("position" OR "Motion" OR "movement" OR "angle" OR "posture")

- **Cochrane Library**

#1 ("shear wave" OR "shear waves" OR "shearwave" OR "shearwaves" OR "shear-wave" OR "shear-waves" OR "acoustic radiation force impulse" OR "ARFI" OR "shear imaging" OR sonoelastography OR elastography) 1048

#2 MeSH descriptor: [Elasticity Imaging Techniques] explode all trees 216

#3 #1 OR #2 1123

#4 ("Nerve" OR "nerves" OR "neural tissue" OR "nervous system" OR "Neurodynamic") 73240

#5 MeSH descriptor: [Nervous System] explode all trees

#6 #4 OR #5

#7 ("position" OR "positions" OR "posture" OR "postures" OR "movement" OR "Angle" OR "Motion" OR "Tension" OR "stretch" OR "excursion" OR "biomechanics")

#8 MeSH descriptor: [Movement] explode all trees

#9 MeSH descriptor: [Posture] explode all trees

#10 MeSH descriptor: [Range of Motion, Articular] explode all trees

#11 #7 OR #8 OR #9 OR #10

#12 #3 AND #6 AND #11
